# Supplementary material
Source: publisher site journal article supplement (https://www.dovepress.com/article/428851)
Supplement: Supplementary file 1 [file get_supplementary_file.php]

**Appendix 1**

**Survey**

**The following questions relate to your residency and pre-fellowship experience**

1. In what specialty did you complete your residency?

1. Anesthesiology
2. Psychiatry
3. Physical Medicine and Rehabilitation
4. Neurology
5. Other __________

2. Did you have Intrathecal Drug Delivery Systems (IDDS) training or exposure prior to the start of your fellowship? (Check all that apply.)

1. Yes, I had formal IDDS training in residency.
2. Yes, I had IDDS training from activities outside of residency such as industry workshops/ courses and conferences
3. No

3. Which of the following aspect of IDDS care have you been involved with prior to the start of your fellowship? (Check all that apply)

1. IDDS trials (single shot outpatient or catheter-based inpatient)
2. IDDS surgical implant procedure
3. Intrathecal pump refills
4. Intrathecal catheter access port studies and rotor studies
5. Anesthetic care for patients with IDDS

4. If you have attended IDDS workshops/courses/conferences prior to your fellowship, what company or companies sponsored your training? (Check all that apply.)

| Medtronic |
| --- |
| Flowonix |
| Conference/society course sponsored by industry |
| I have not attended an IDDS workshop/course/conference |
| Unsure who sponsored it |

**The next questions pertain to your choice of fellowship program.**

1. When ranking fellowship programs, how much did IDDS training factor into your fellowship choice?

1. I chose this fellowship solely because it emphasizes IDDS training
2. IDDS training was one of many factors contributing to my fellowship choice
3. IDDS training had no bearing on my fellowship decision

2. Did you choose your fellowship based on your perceptions of previous graduates’ use

of IDDS?

a. Yes, I chose this program because previous graduates use IDDS in their current practice

b. No, alumni use of IDDS in their current practice was not a consideration when I choose this program

**The following questions relate to your current fellowship experience**

1. Approximately how many **IDDS trials** have you directly participated in (placing needles or catheter)?

1. 0
2. 1-5
3. 6-10
4. 11-15
5. >15
6. Not sure

2. Approximately how many **IDDS surgical implants** have you directly participated in?

1. 0
2. 1-5
3. 6-10
4. 11-15
5. >15
6. Not sure

3. Approximately how many **IDDS pump refills** have you directly participated in?

1. 0
2. 1-5
3. 6-10
4. 11-15
5. >15
6. Not sure

4. Approximately how many **IDDS pump catheter access port studies and rotator studies** have you directly participated in?

1. 0
2. 1-5
3. 6-10
4. 11-15
5. >15
6. Not sure

5. Which IDDS manufacturers have you been exposed to during your fellowship training?

| Medtronic |
| --- |
| Flowonix |
| Other |

6. During your fellowship training, approximately what percentage of your surgical implant cases were performed with the aid of a spine surgeon?

a. 0%

b. 1-20%

c. 21-40%

d. 41-60%

e. 61-80%

f. 81-99%

g. 100%

7. Intrathecal therapy should be suggested for which of the following pain conditions? (Check all that apply)

a. Intolerable non cancer related axial neck or back pain that is refractory to conservative medical care

b. Intolerable non cancer related abdominal and pelvic pain that is refractory to conservative medical care

c. Intolerable trunk or extremity neuropathic pain that is refractory to conservative medical care

d. Complex Regional pain syndrome

e. Cancer related pain

f. Lack of efficacy or intolerance to systemic opioid therapy

g. Severe spasticity that is refractory to conservative medical care

h. All the above

8. How proficient do you feel performing IDDS **trials** independently?

10 Very proficient

9

8

7

6

5 Somewhat proficient

4

3

2

1 Not proficient

9. How proficient do you feel selecting appropriate IT medications, dosing and trialing method for patients currently treated with systemic opioids?

10 Very proficient

9

8

7

6

5 Somewhat proficient

4

3

2

1 Not proficient

10. How proficient do you feel performing IDDS **surgical** **implants** independently?

10 Very proficient

9

8

7

6

5 Somewhat proficient

4

3

2

1 Not proficient

11. How proficient do you feel managing acute postoperative surgical complications following IDDS implant?

10 Very proficient

9

8

7

6

5 Somewhat proficient

4

3

2

1 Not proficient

12. How proficient do you feel performing **IDDS pump refills** independently?

10 Very proficient

9

8

7

6

5 Somewhat proficient

4

3

2

1 Not proficient

13. How proficient do you feel alternating between the various drug delivery methods (simple continuous, flex dosing, patient-controlled analgesia delivery) for patients with IDDS who are not reporting appropriate pain relief?

10 Very proficient

9

8

7

6

5 Somewhat proficient

4

3

2

1 Not proficient

14. How proficient do you feel alternating between various IT medications for patients with IDDS who are not reporting appropriate pain relief?

10 Very proficient

9

8

7

6

5 Somewhat proficient

4

3

2

1 Not proficient

15. How proficient do you feel with performing **catheter access port and rotor studies** IDDS pump independently?

10 Very proficient

9

8

7

6

5 Somewhat proficient

4

3

2

1 Not proficient

16. How do you feel about your exposure to IDDS during your fellowship training?

a. There was an unmet need for IDDS therapy training

b. There was sufficient training for IDDS therapy

c. Don’t know/not sure

17. Indicate whether you consider the following to have been possible barriers for IDDS therapy training during your fellowship (check all that apply).

___Lack of curriculum regarding IDDS

___Lack of faculty with expertise in IDDS therapy

___Not enough IDDS therapy cases at my institution

___There were no barriers for IDDS therapy training

___Don’t know

18.   How many IDDS training workshops/courses have you attended to date in fellowship thus far?

1. 0
2. 1-2
3. 3-4
4. >5

19. If you have attended IDDS workshops/courses/conferences during your fellowship, what company or companies sponsored your training? (Check all that apply.)

| Medtronic |
| --- |
| Flowonix |
| Conference/society course sponsored by industry |
| I have not attended an IDDS workshop/course/conference |
| I do not know who the sponsor was |

**The following questions relate to your future practice**

1. In what type of practice do you want to work after your fellowship? (Check all that apply.)

1. Private practice
2. Academic
3. Hospital based
4. Industry
5. Other: __________________
6. Undecided

2. Do you plan to incorporate IDDS into your future practice?

a.     Yes, I plan to perform IDDS trials and implantations

b.     Yes, I plan to perform IDDS trials but not implantations

c.     Yes, I plan to manage patients with implants but plan to refer for trial and implantation

d.     No, I do not plan to manage IDDS patients.

e. I do not know whether I will have IDDS patients in my future practice.

3. How much of an influence do you think your IDDS training had in you being selected for your new position?

a. A great deal

b. Much

c. Somewhat

d. Little

e. Not at all

f. Don’t know/unsure

4.Which of the following areas regarding developing an IDDS program did you receive guidance and mentorship for during your fellowship training?

| I received guidance in… | Yes | No |
| --- | --- | --- |
| Learning how to obtain support from my department (identifying an implant coordinator, compounding pharmacy) |  |  |
| Learning how to adequately track patient outcomes and medication refill dates |  |  |
| Learning how to navigate insurance guidelines |  |  |
| Learning how to build a referral network |  |  |
| Learning how to obtain support from other departments (ie, neurosurgery) |  |  |
| Learning how to adequately track patient outcomes, refill dates |  |  |

5. Will you have mentors that are experienced with IDDS at your future practice to help?

a. Yes

b. No

c. Don’t know/unsure

6. At your future practice, approximately how many IDDS implants are done each year?

a. 0

b. 1-10

c. 11-20

d. 21-50

e. 51-100

f. >100

g. Don’t know/unsure

7. What would be the reasons that would make you ***not*** want to use IDDS? (Check all that apply)

___ I question the long-term success rate

___ Revision and maintenance requirements

___ Reimbursement

___ Departmental and institutional support

___ Patient compliance

___ Do not believe IDDS is indicated in pain patients

___ Personal lack of interest

___ Lack of adequate training

___ Other________

**The following questions relate to industry involvement and standardization of training**

1. In your opinion, who should be involved in standardizing IDDS training? (Choose one only.)

1. ACGME/fellowship directors
2. Industry workshops
3. Pain medicine societies
4. Other ___________________
5. All the above
6. I do not believe that IDDS training should be standardized

2. How do you feel about the direct training of fellows by IDDS manufacturers?

1. Strongly support
2. Somewhat support
3. Neutral/no opinion
4. Somewhat against
5. Strongly against
